# Supplementary material
Source: publisher site journal article supplement (https://www.dovepress.com/article/383212)
Supplement: Supplementary file 1 [file get_supplementary_file.php]

| **Supplemental Table 1.** Patient Telehealth Satisfaction Response Frequencies | | | | | |
| --- | --- | --- | --- | --- | --- |
|  | Strongly disagree | Somewhat disagree | Neither agree nor disagree | Somewhat agree | Strongly agree |
| AR-IMPACT made it easier for me to see a specialist for chronic pain | 3 | 0 | 0 | 1 | 4 |
| AR-IMPACT saved me time traveling to a hospital or specialist clinic | 1 | 0 | 1 | 0 | 6 |
| I could easily talk to the team of doctors through AR-IMPACT's telehealth services | 0 | 0 | 0 | 4 | 4 |
| Using the AR-IMPACT telehealth system, I could see the doctor as well as if we met in person | 0 | 0 | 1 | 0 | 7 |
| Without AR-IMPACT, I would not have been able to get the care I needed | 2 | 1 | 0 | 1 | 3 |
| I think it is important that Arkansas has a telehealth program like AR-IMPACT to serve patients in need | 1 | 0 | 0 | 0 | 7 |
| I think AR-IMPACT is an acceptable way to receive healthcare services | 1 | 0 | 0 | 2 | 5 |
| I would be happy to use a program like AR-IMPACT again if I needed care from a pain management specialist | 1 | 1 | 0 | 1 | 5 |
| I think the visit provided over the telehealth system are as good as in-person visits | 0 | 0 | 1 | 3 | 4 |
| Overall, I am satisfied with the AR-IMPACT telehealth system | 1 | 0 | 0 | 2 | 5 |
| I intend to follow the pain management plan developed in consultation with AR-IMPACT specialists and my primary care physician. | 1 | 0 | 0 | 0 | 7 |
| I am confident I can follow the pain management plan developed in consultation with AR-IMPACT specialists and my primary care physician. | 1 | 0 | 0 | 2 | 5 |
| The interprofessional team approach of AR-IMPACT was better than seeing one individual provider alone. | 2 | 0 | 0 | 2 | 4 |

**Appendix**

Primary Care Physician Survey Responses

| **Survey Question** | **Physicians Answers** |
| --- | --- |
| **Why did you choose to participate as a provider in the AR-IMPACT program?** | It would be the same reason that I would consult with a nephrologist on a patient that possibly needs dialysis or with a cardiologist on a patient that has unstable coronary artery disease. |
| I have 3 chronic pain patients that I have provided care for over the years, inherited by me from other pain providers. Each came to me with high MME/d opioid treatment. I have been able to successfully wean all 3 of them to lower MME/d dosing, but have only been able to convince 1 of them to get the AR Impact consultation, which was very helpful. The other 2 patients seem fearful that the control of their pain management will be taken away from me as their PCP, and they are frightened of that proposition. |
| Poor local resources; a virtually available multidisciplinary team for chronic pain fills a local gap in community pain coverage. |
| To improve patient outcomes and confidence that they were being heard and offered comprehensive multidisciplinary care from a team of providers. |
| Easy and convenient |
| **You might know some colleagues who did not participate in AR-IMPACT, or were hesitant to do so. What have been their reasons for not participating?** | I don't know. I have been speaking to all of the RP staff and no one seems interested. I guess that I must be the only one that has patients who have been on chronic opioids for years and years whose only answer to the increasing pain is increasing their pain medication. |
| I do not know. |
| They were concerned that AR-Impact makes recommendations instead of implementing changes. |
| They were unaware of this program. |
| **What challenges, if any, have you had referring patients to AR-IMPACT?** | I thought that it would be getting patients to try it but really it is just finding the time to sit down and set it up. |
| It is a bit of a cumbersome process, and fortunately my Behavioral Health faculty colleague, Leigh Wade, helped to navigate the waters for me with the patient referral. |
| Our behavioral health specialist assists us in the referral; some patients do not want to go through behavioral health. |
| No challenges. |
| **What factors, if any, have helped you refer patients to AR-IMPACT?** | Just getting to know Dr. Goree and his staff. |
| I think that having my 1 patient success with AR Impact consultation will give me a higher degree of confidence in urging my other 2 with high MME/d needs to accept the assistance offered by your program. |
| The fact that it is a multidisciplinary approach so multiple facets are being considered. Being available virtually really helped as many of my patient have trouble with transportation. |
| Jami Duran is amazing at helping us refer patients to AR Impact and getting all paperwork set up. |
| Ease of referral. |
| Uncontrollable pain. |
| **What characteristics do you feel make a patient a good fit for AR-IMPACT?** | Those patients described above: chronic pain patients whose only answer to increased pain was to increase their pain medication, which often increased their pain. |
| Willingness to reduce their opioid dependence, on a slow and steady tapering schedule. |
| Multifactorial pain - pain that has MSK as well as psych or spinal elements. |
| Patients who have chronic pain and are struggling with mental health due to the pain. |
| Chronic pain, chronic mental illness, patients with diseases that progress, such as COPD and T2DM. |
| Pain not controlled with medications or therapy. |
| **What reasons, if any, have your patients given for not participating in this program?** | Not sure they have any. |
| They fear an abrupt change or withdrawal of their opioid pain management. |
| N/A. All pts that have declined have said they simply did not want to or did not give a reason. |
| Not having a computer for the virtual visit. |
| **How can the process, from referral to the telemedicine appointment be improved?** | I'm not sure. It has really been easy to set up and the experience on the few patients of mine that have done this has been positive. |
| I'm not sure. |
| I think the process overall works well - it might help to have pamphlets or fliers to assist me in explaining to patients what the program is to try to get some patient buy-in. |
| Help patients with the technology aspect of the visit. |
| **Were you able to implement any of the recommendations provided by the AR-IMPACT team?** | Yes |
| Yes |
| Yes |
| Yes |
| Yes |
| Yes |
| **What types of recommendations did you and your patients have the most and least success with?** | Least: weaning them down from their high dose of opioids. Most: following all of the other recommendations. |
| It was reassuring to me that the process that I am using to taper MME/d opioid doses was looked favorably upon by the AR Impact consultants. |
| Sleep hygiene was the least successful (patients typically report that pain interrupts their sleep). Some medication changes are difficult. Physical therapy changes have probably been easiest to implement if patient is willing to do PT. |
| **What adaptations, if any, have you had to make to the recommendations to improve their implementation?** | None |
| I cannot think of any. |
| None. |
| **To your knowledge, has your practice or patients experienced any unintended consequences as a result of participating in the AR-IMPACT program?** | No |
| None. |
| None. |
| **Do you have any other suggestions to improve the program for providers or patients?** | No. |
| None. |
| A single follow-up visit with the original team might be helpful to follow-up on and revise recommendations. |
